# Supplementary material for: Large-scale transcriptomics to dissect two years of the life of a fungal phytopathogen interacting with its host plant
Source: bioRxiv or medRxiv preprint supplement (doi:10.1101/2020.10.13.331520), 2020-11-23
Supplement: Supplementary file [file media-8.pdf]

**A**

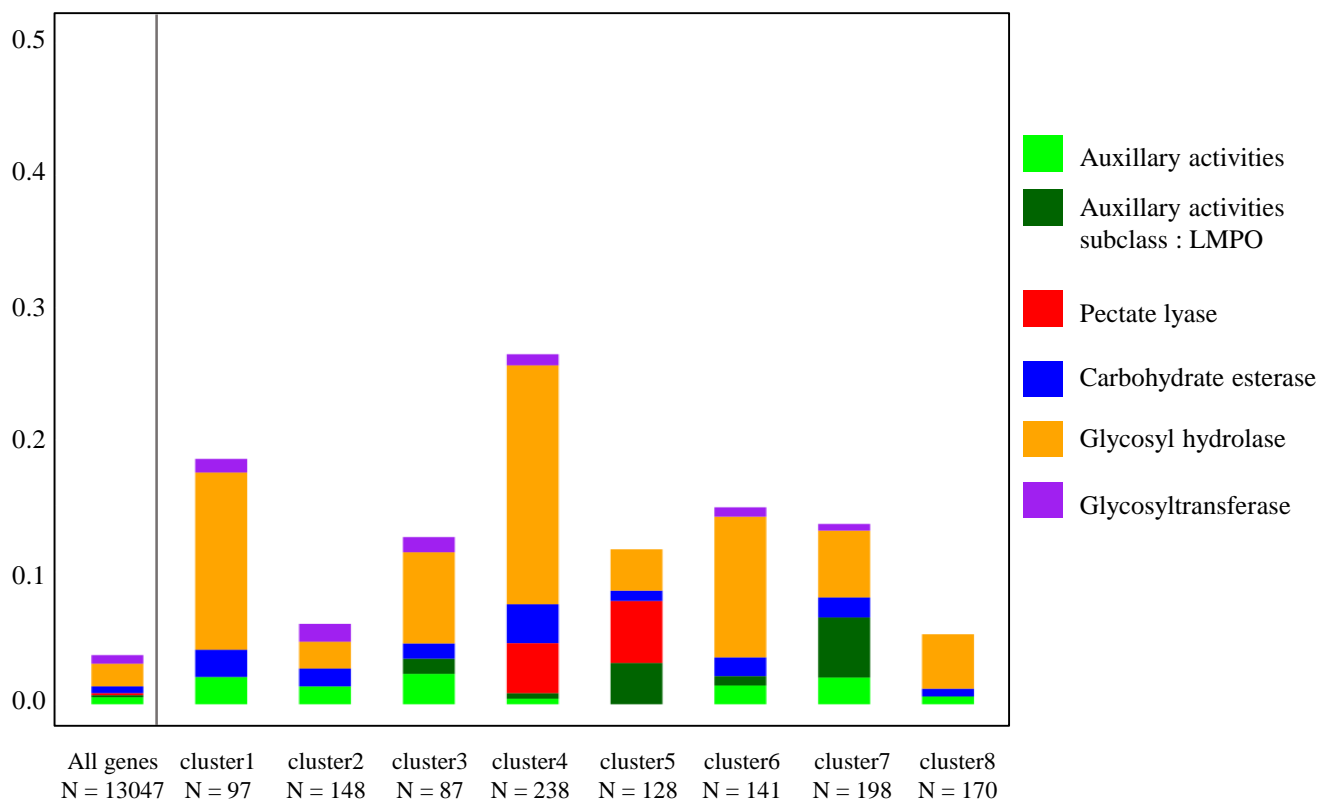

**B**

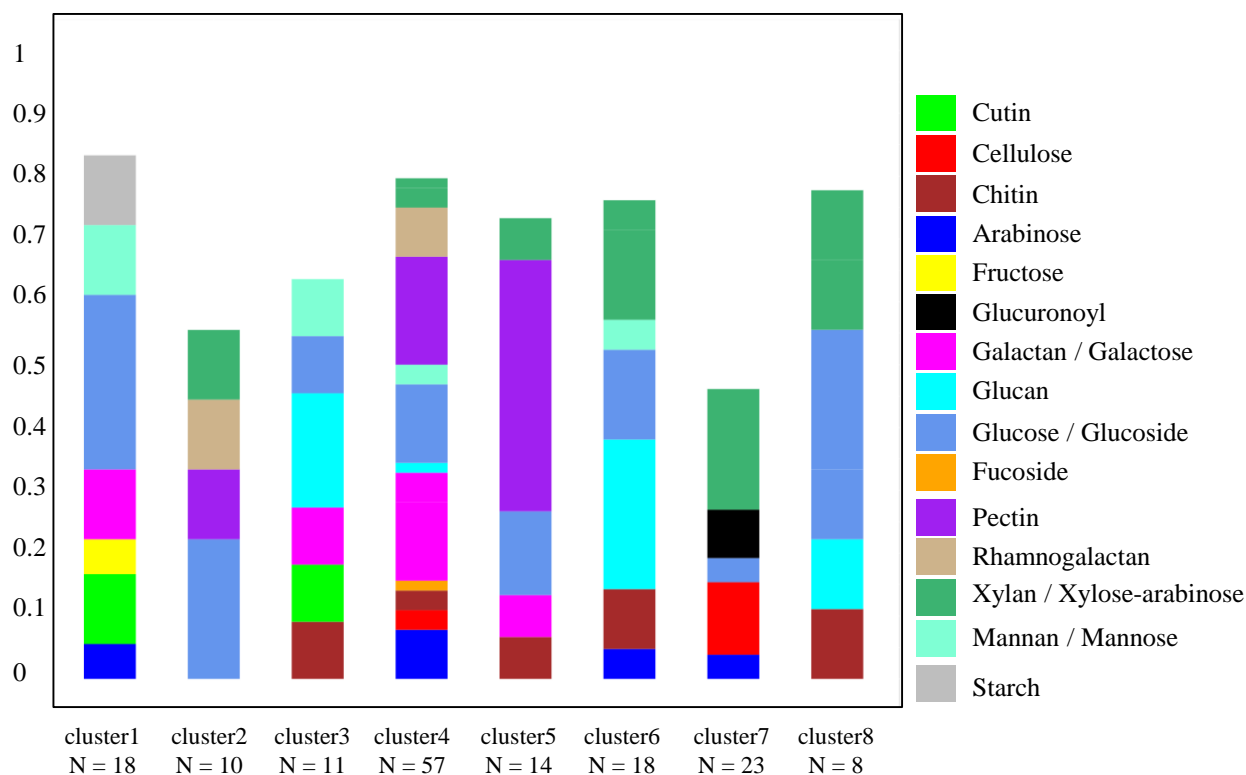

**S5 Fig. Proportion of different classes of CAZymes and their substrates in the eight gene clusters.** (A) The proportion of the six CAZyme classes and one subclass of CAZymes with auxiliary activities (LMPO: lytic polysaccharide monooxygenase) within the clusters (cluster 1 to 8) or the whole gene set of *Leptosphaeria maculans* (N, number of genes in each cluster). (B) The proportion (y-axis: from 0 to 1) of the identified CAZyme substrates relative to the total number of CAZymes in each cluster (N).
