# Supplementary material for: Large-scale transcriptomics to dissect two years of the life of a fungal phytopathogen interacting with its host plant
Source: bioRxiv or medRxiv preprint supplement (doi:10.1101/2020.10.13.331520), 2020-11-23
Supplement: Supplementary file [file media-14.pdf]

**S3 Table. Detection and cluster distribution of PKS and NRPS genes among the 1,207 *Leptosphaeria maculans* genes upregulated in planta.**

<sup>a</sup>. PKS and NRPS were annotated by SMURF tool

| Gene ID [49]  | Cluster assignation | PKS/NRPS annotation <sup>a</sup> | Associated metabolite |
|---------------|---------------------|----------------------------------|-----------------------|
| Lmb_jn3_11562 | cluster 2           | PKS                              | Absciscic acid        |
| Lmb_jn3_03490 | cluster 4           | NRPS                             | -                     |
| Lmb_jn3_12570 | cluster 5           | PKS                              | -                     |
| Lmb_jn3_00988 | cluster 6           | NRPS                             | Sirodesmin            |
| Lmb_jn3_05348 | cluster 6           | PKS                              | Phomenoic acid        |
| Lmb_jn3_06412 | cluster 6           | PKS                              | -                     |
| Lmb_jn3_11822 | cluster 6           | NRPS-like                        | -                     |
